# Supplementary material for: A Combinatorial Regulatory Platform Determines Expression of RNA Polymerase III Subunit RPC7α (POLR3G) in Cancer
Source: MDPI journal article supplement (doi:10.3390/cancers15204995), 2023-10-15

# Uncropped WB

Cancers-2070777

Corresponding to  
Fig1.b

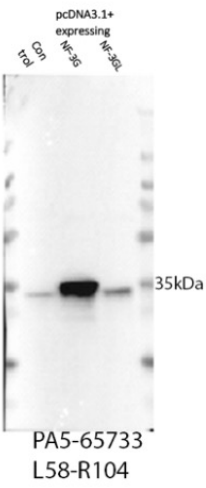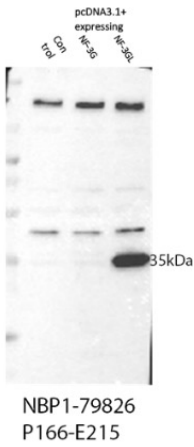

Corresponding to Fig2.f

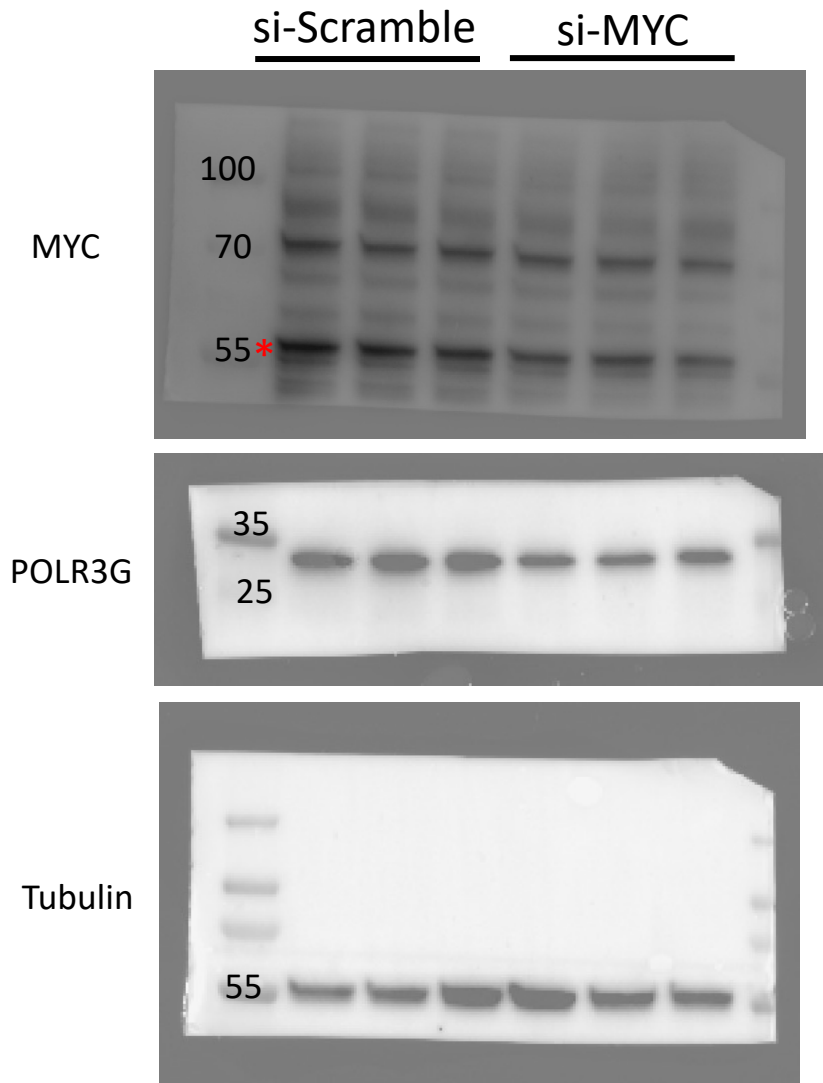

Corresponding to Fig2. l

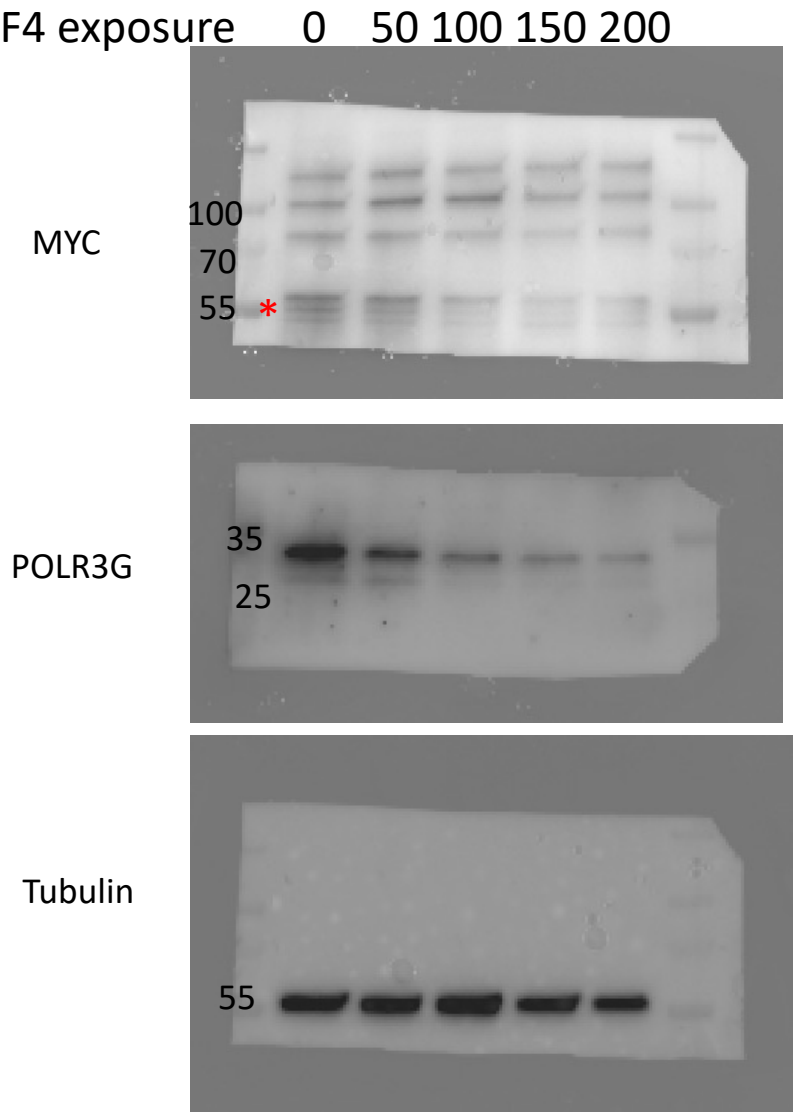

Biological replicate

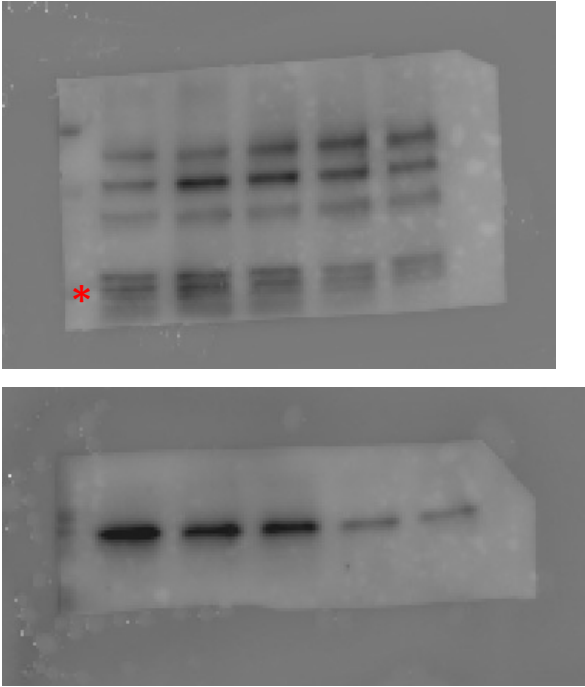

Corresponding to Fig2.i

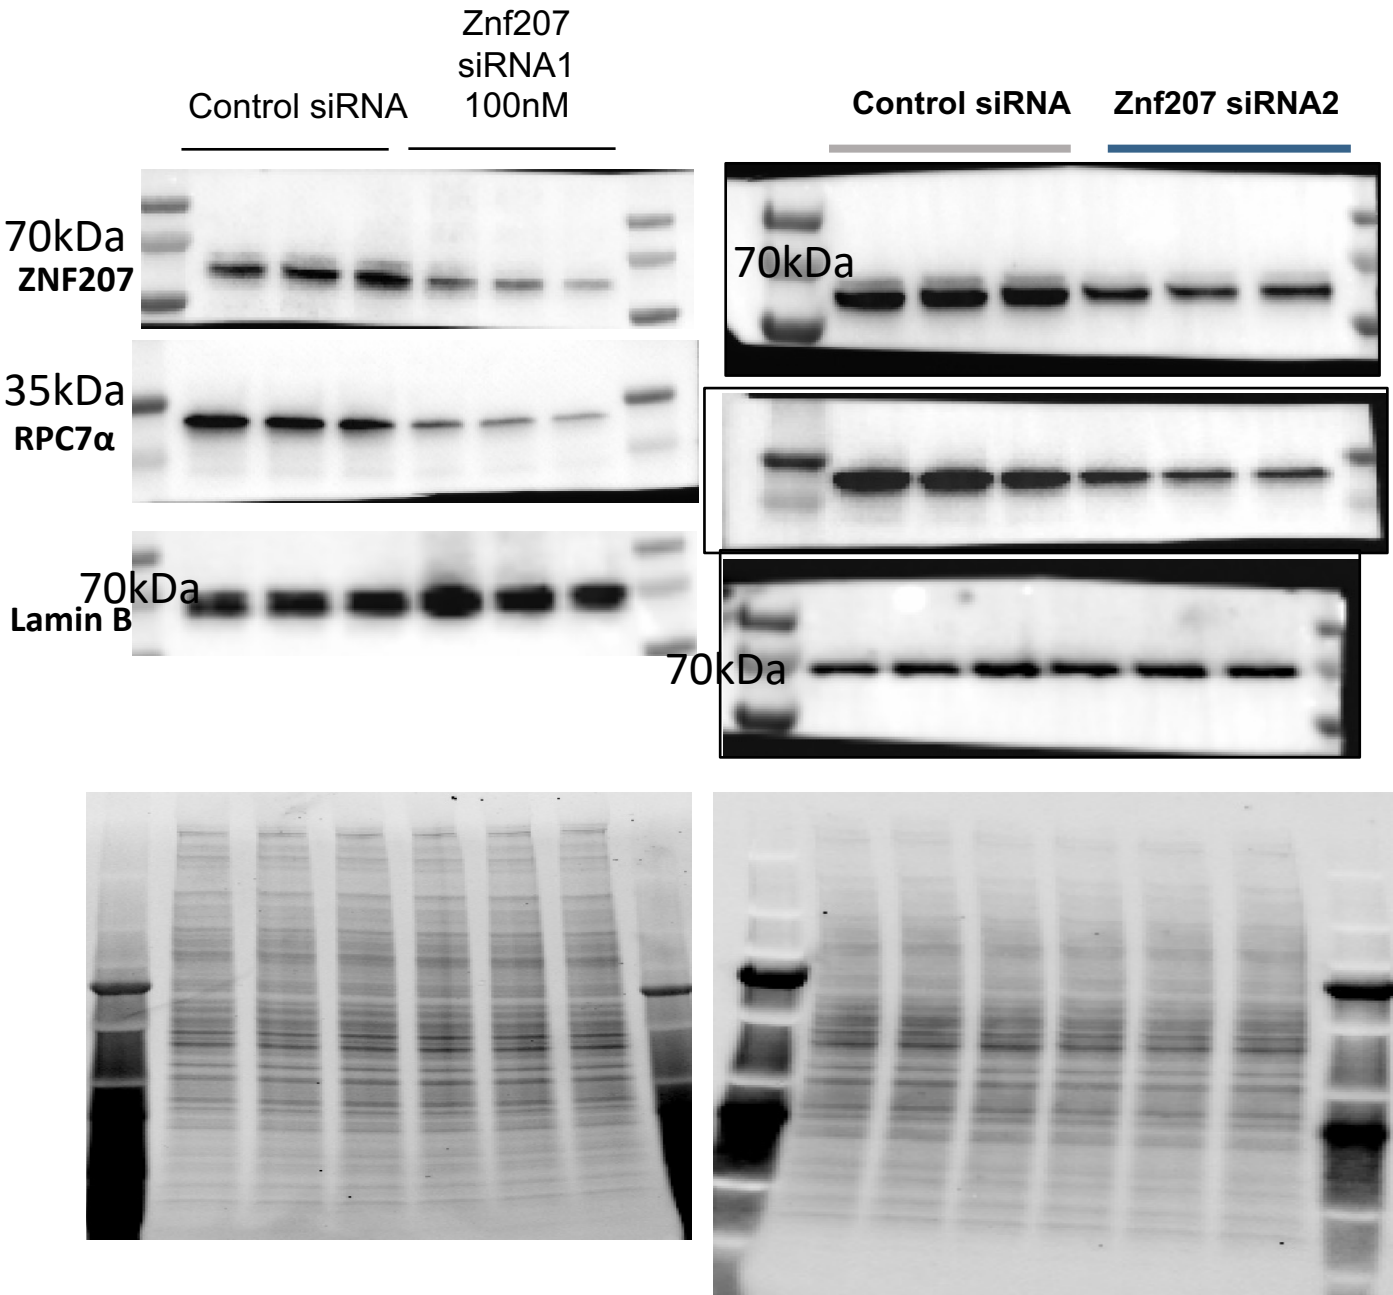

Corresponding to Fig2.o

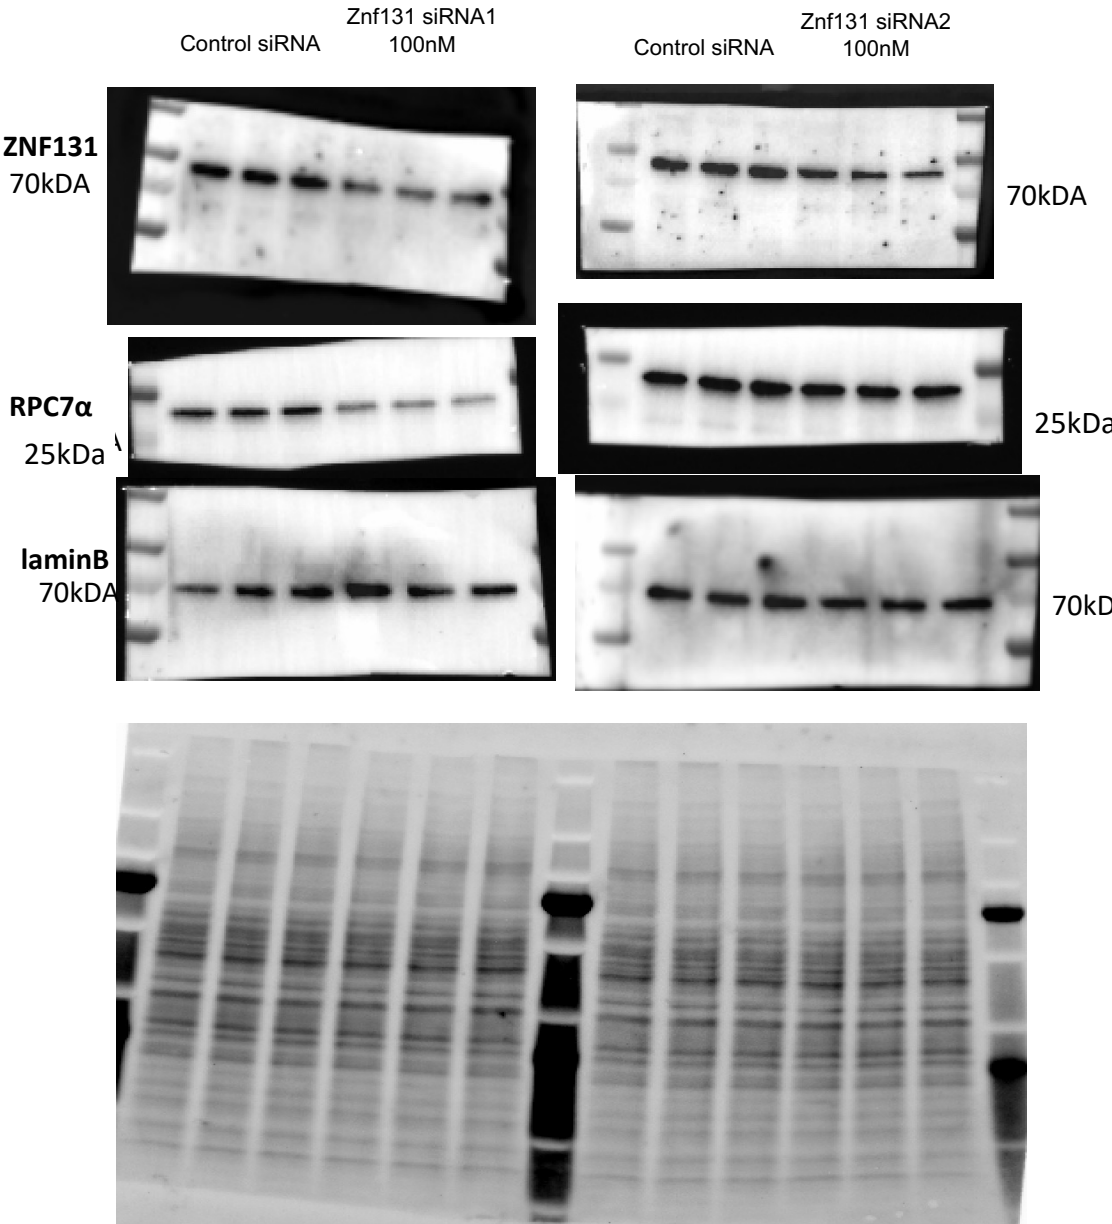

Corresponding to  
Fig3.g

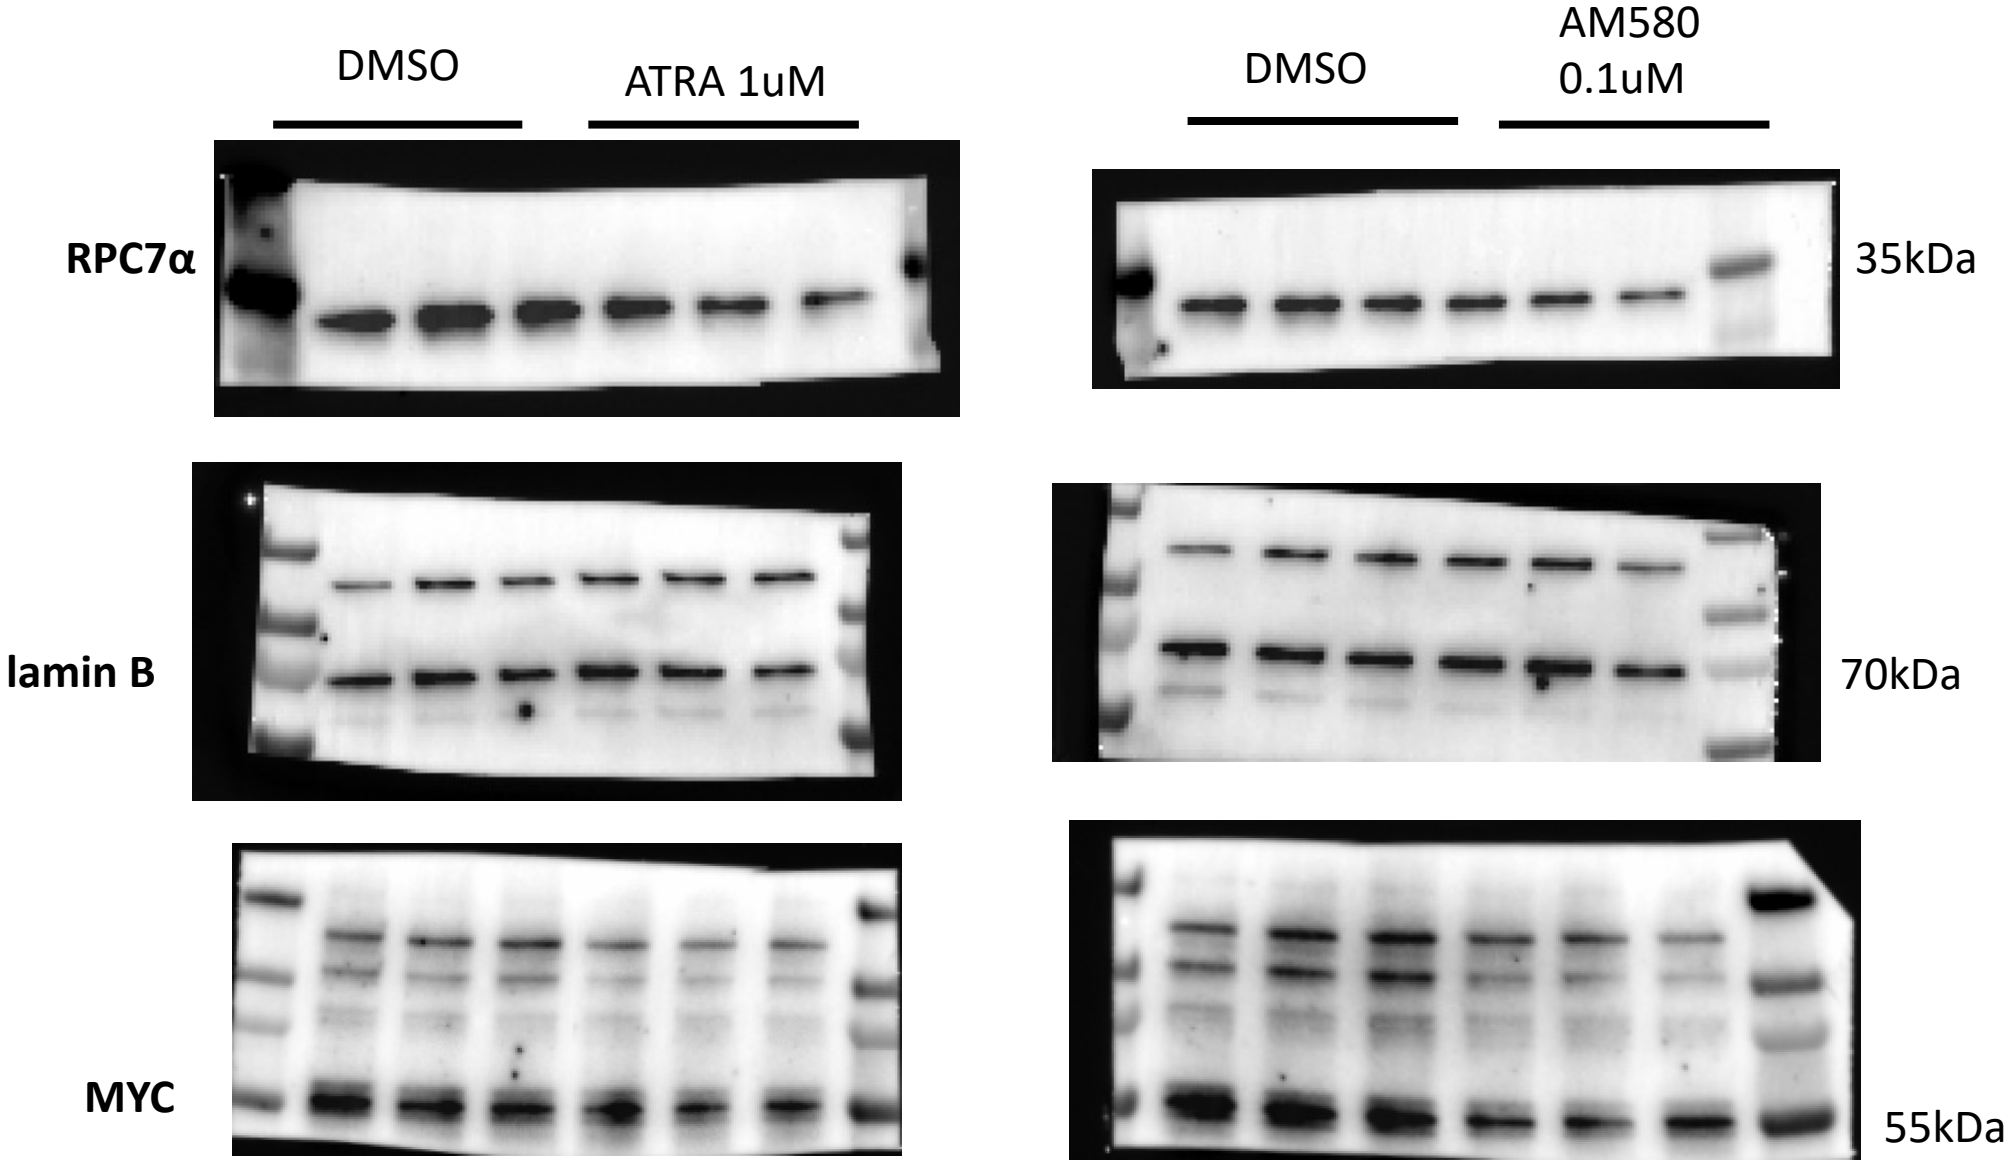

Corresponding to Supplemental figure 1

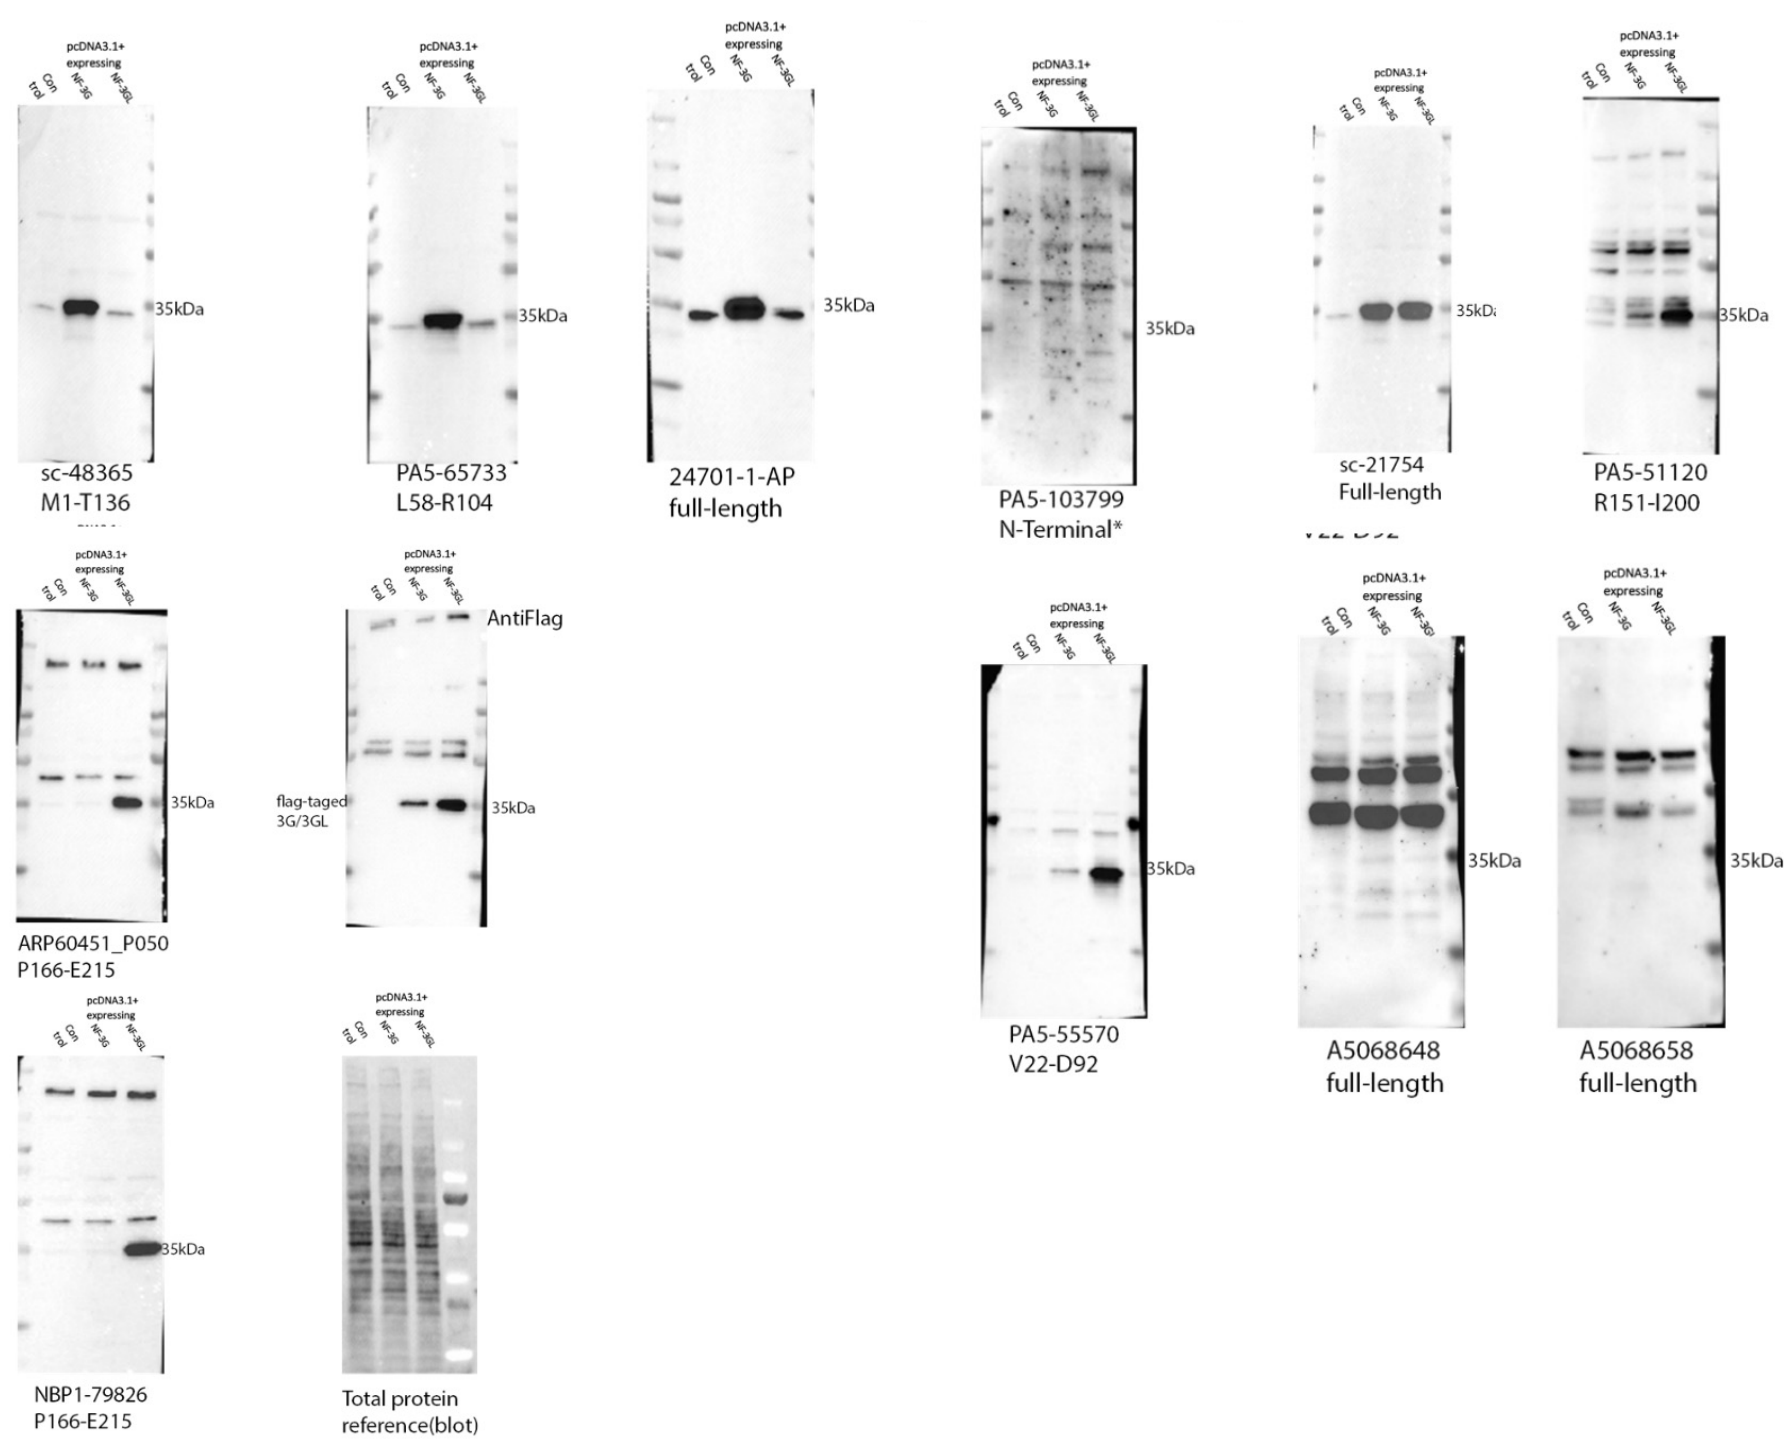

Corresponding to Supplemental figure 3.d

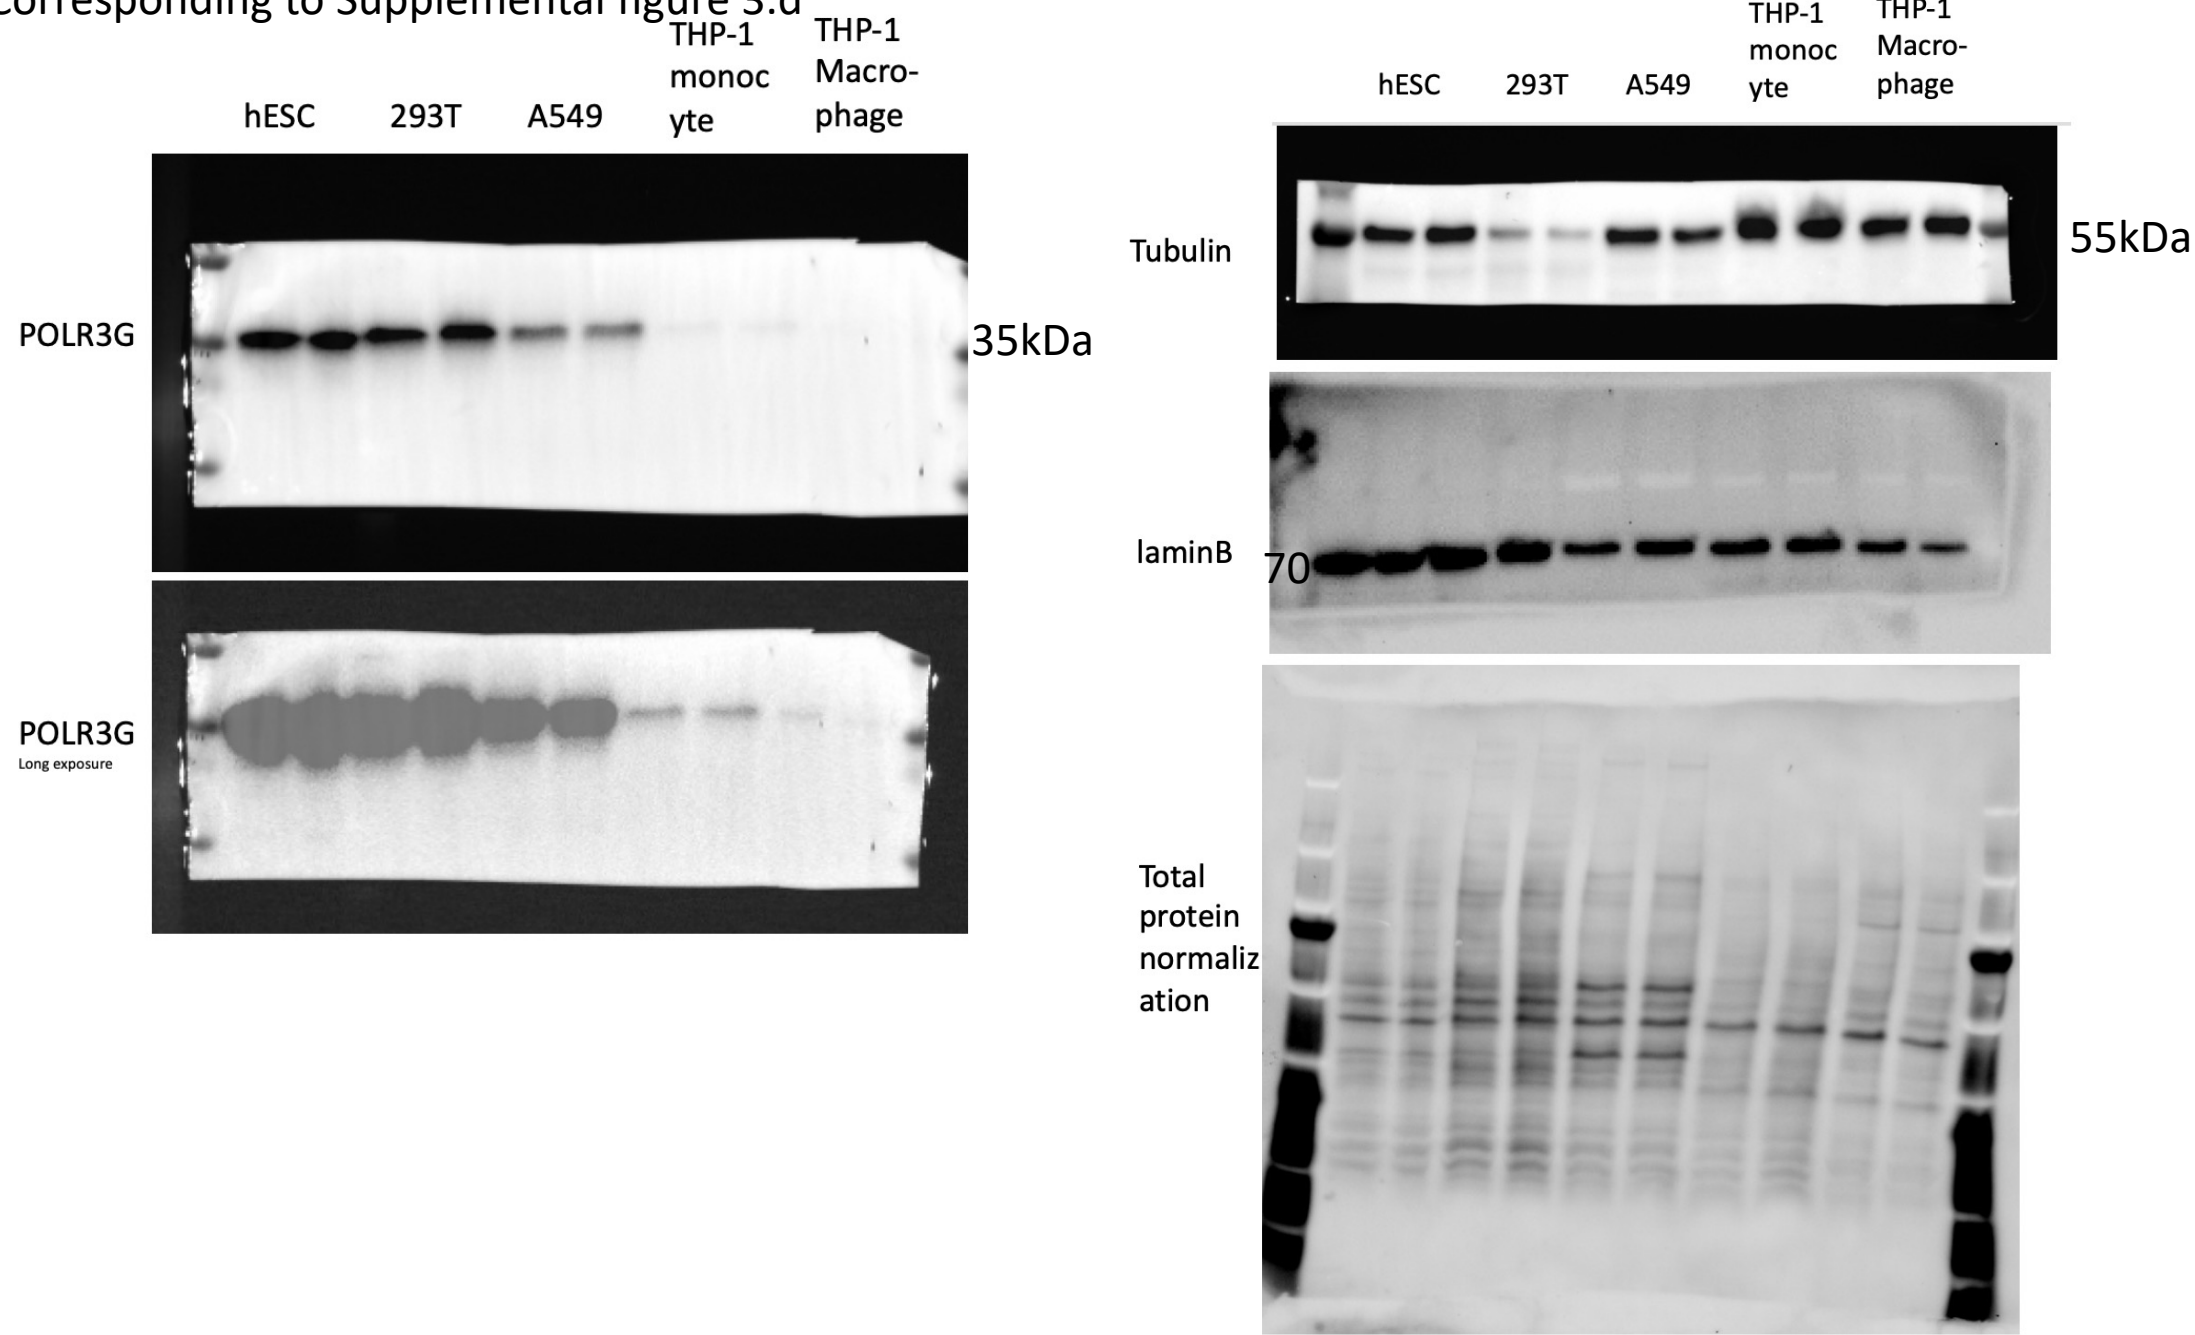



Corresponding to Supplemental figure 4 c

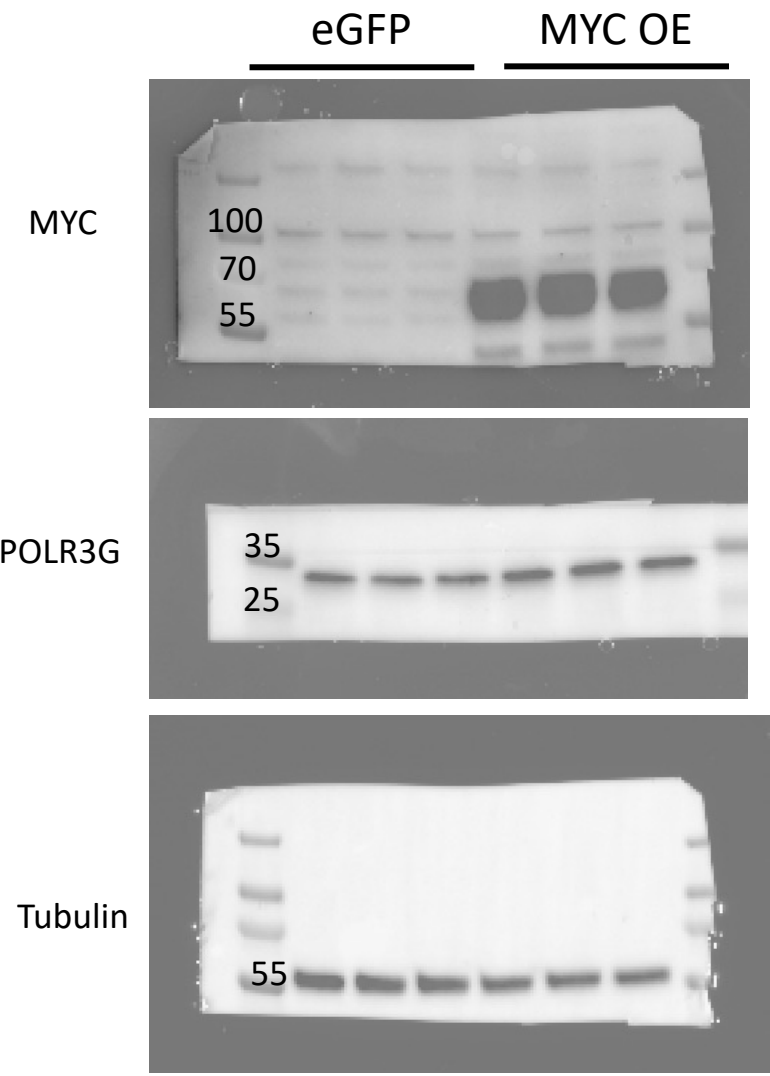

Corresponding to Supplemental figure 6

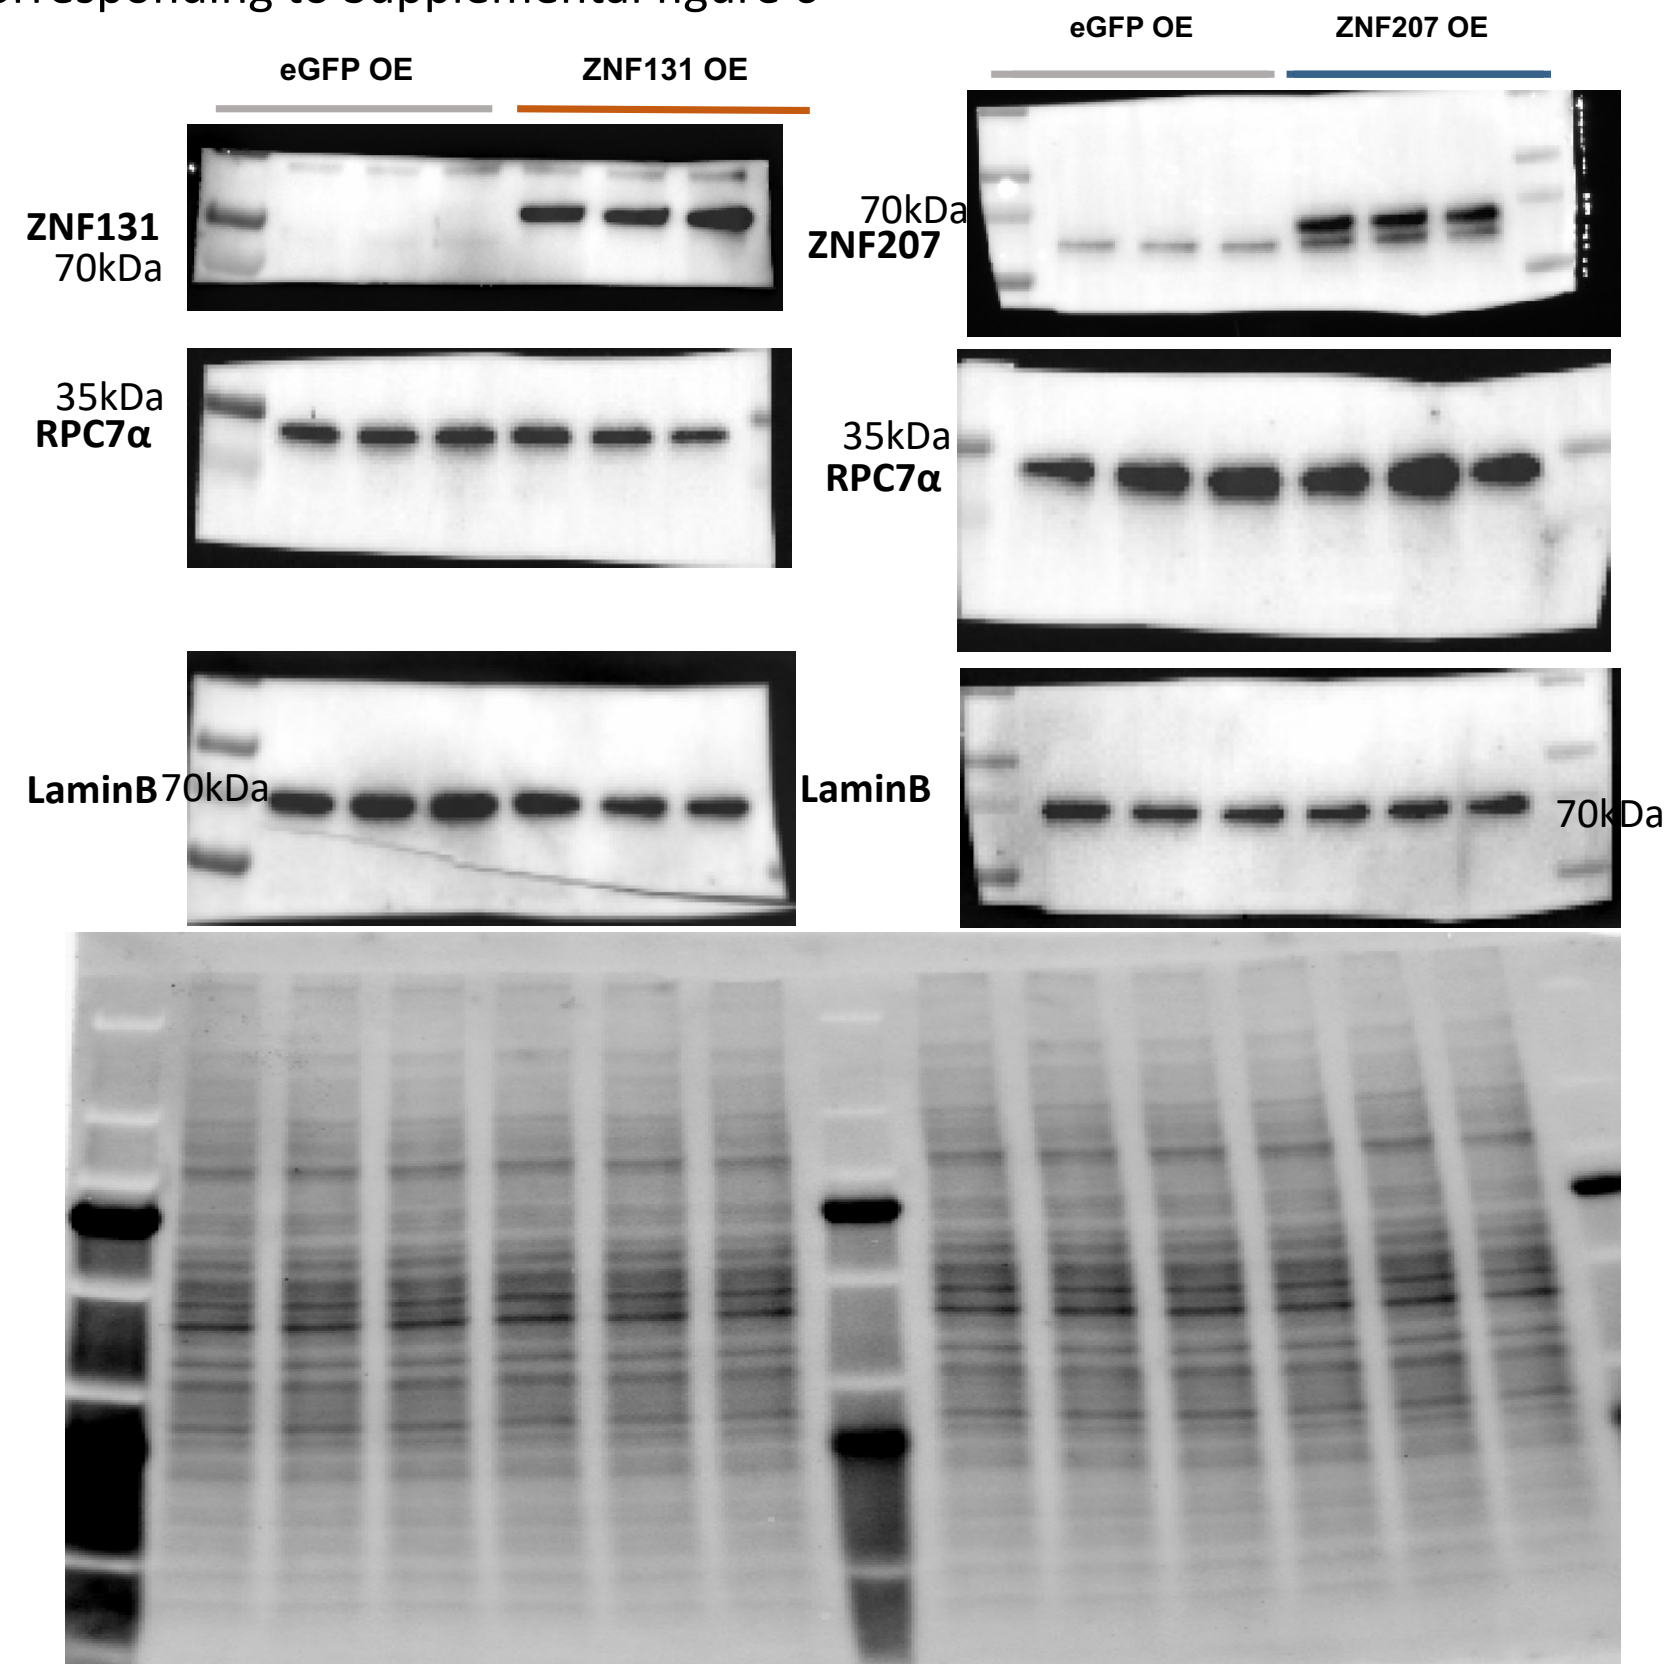

Corresponding to Supplemental figure 9

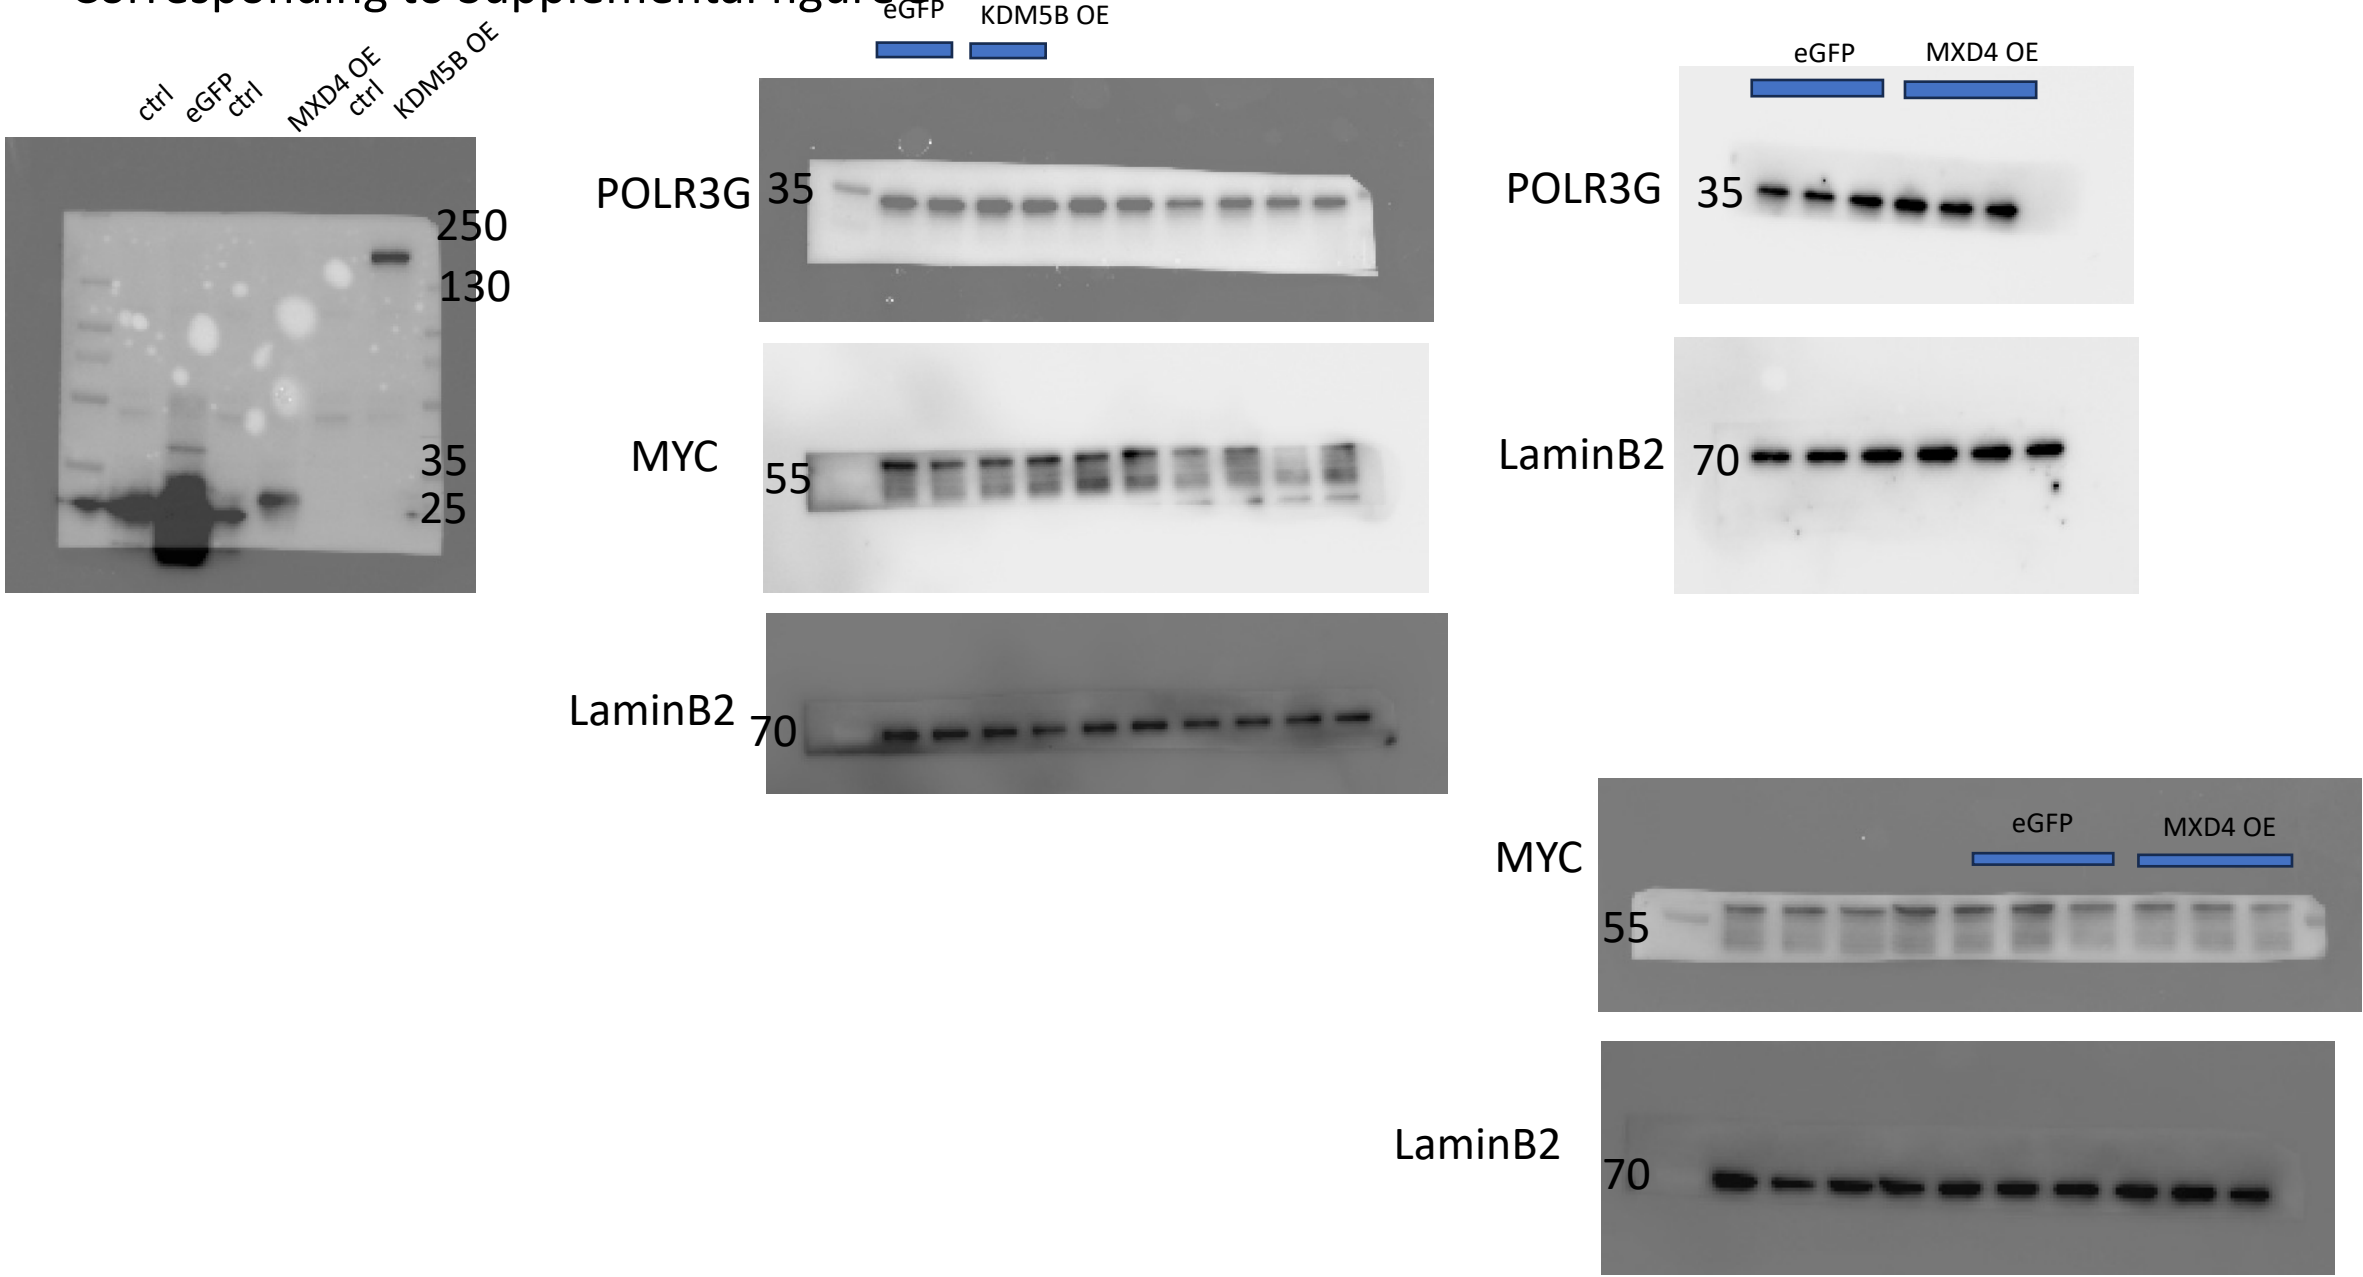

Supplement: s1 [file s1]
